# Supplementary material for: Re-Directing an Alkylating Agent to Mitochondria Alters Drug Target and Cell Death Mechanism
Source: PubMed Central journal article supplement (PMC3621862; doi:10.1371/journal.pone.0060253), 2013-04-09

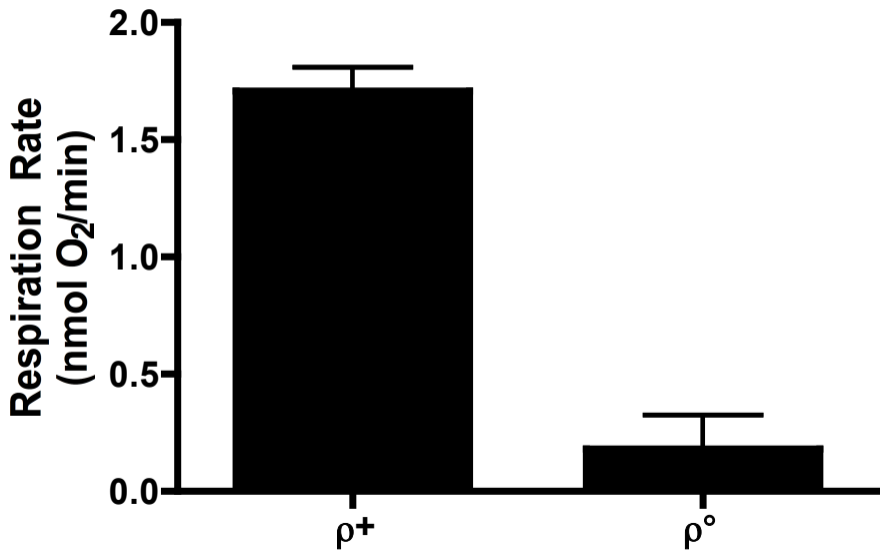

Supplement: pone.0060253.s001.pdf [file pone.0060253.s001.pdf]
