# Supplementary material for: Re-Directing an Alkylating Agent to Mitochondria Alters Drug Target and Cell Death Mechanism
Source: PubMed Central journal article supplement (PMC3621862; doi:10.1371/journal.pone.0060253), 2013-04-09

*Unt*

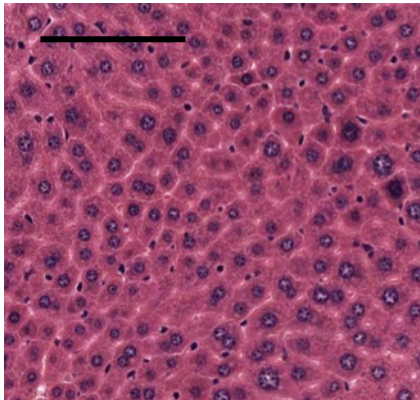

*Cbl*

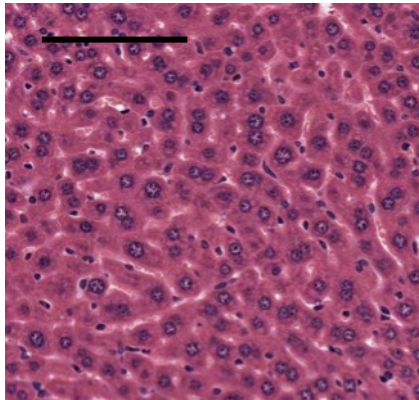

*Mt-Cbl*

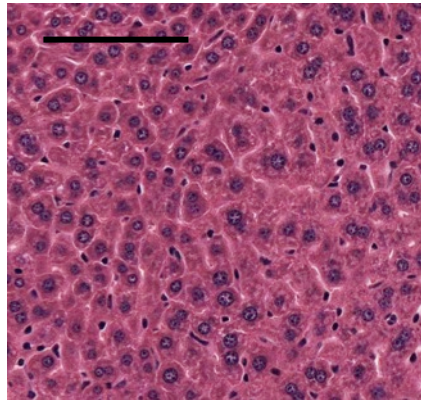

Supplement: pone.0060253.s009.pdf [file pone.0060253.s009.pdf]
