# Supplementary material for: Re-Directing an Alkylating Agent to Mitochondria Alters Drug Target and Cell Death Mechanism
Source: PLOS journal article supplement (doi:10.1371/journal.pone.0060253), 2013-04-09

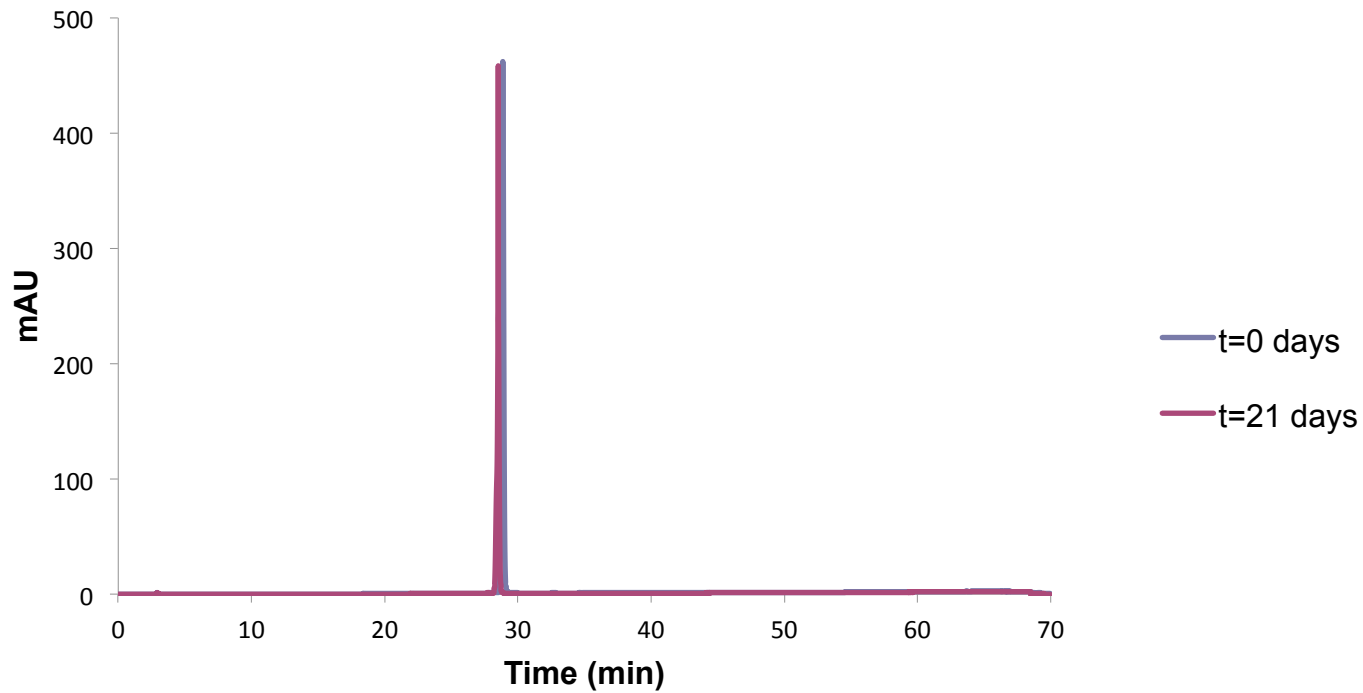

Supplement: S7 (10.1371/journal.pone.0060253.s007) [file journal.pone.0060253.s007]
